# Supplementary material for: Development of a Redox-Polymer-Based Electrochemical Glucose Biosensor Suitable for Integration in Microfluidic 3D Cell Culture Systems
Source: MDPI journal article supplement (doi:10.3390/bios13060582), 2023-05-27
Supplement: s1 [file s1]

Supplementary Material

# Development of a Redox-Polymer-Based Electrochemical Glucose Biosensor Suitable for Integration in Microfluidic 3D Cell Culture Systems

L. Navarro-Nateras, Jancarlo Diaz-Gonzalez, Diana Aguas-Chantes, Lucy L. Coria-Oriundo, Fernando Battaglini, José Luis Ventura-Gallegos, Alejandro Zentella-Dehesa, Goldie Oza, L. G. Arriaga and Jannu R. Casanova-Moreno.

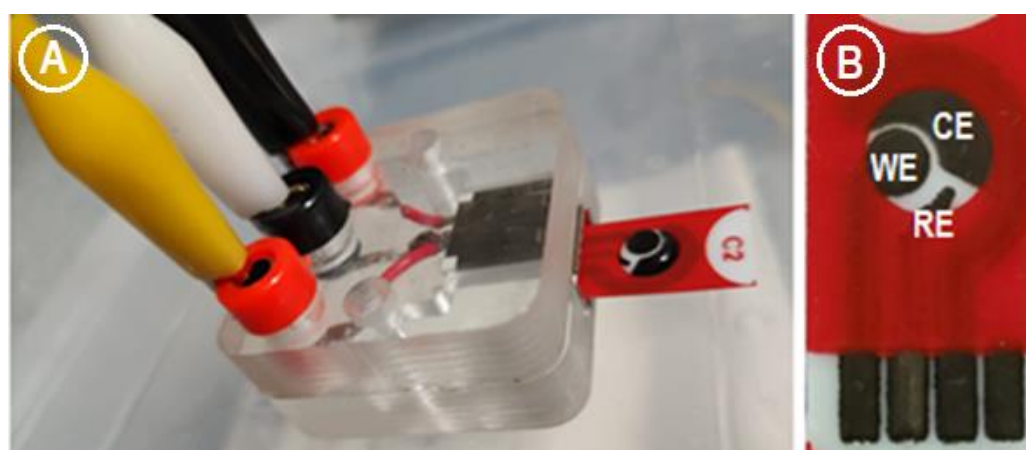

**Figure S1.** (A) Electrochemical cell setup with a carbon screen printed electrode (SPE.) (B) Carbon SPE with a carbon working (WE) and counter (CE) electrodes, and a C/Ag|AgCl mixture as reference electrode (RE).

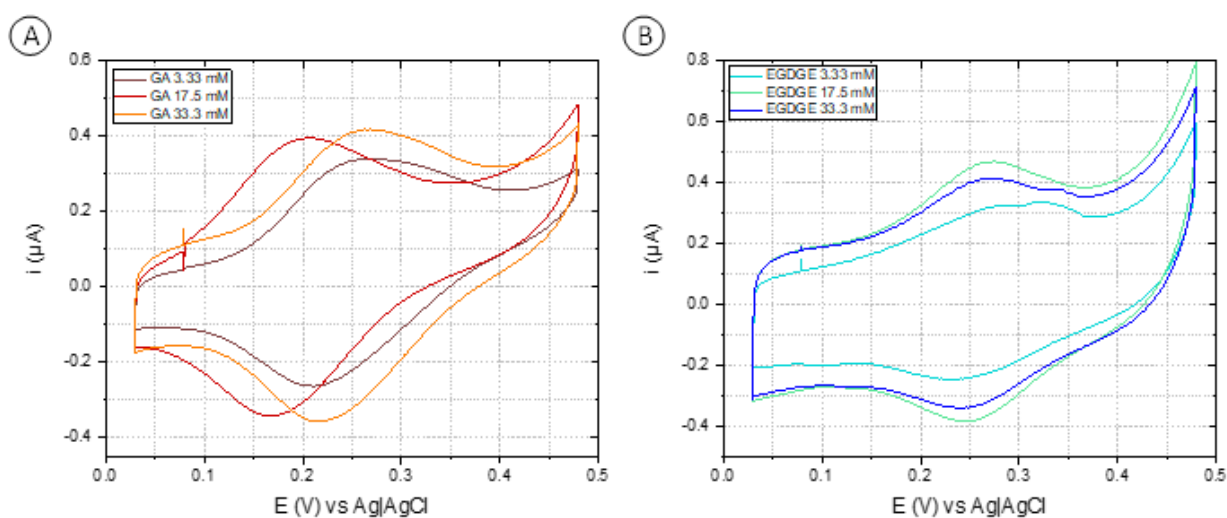

**Figure S2.** Cyclic voltammograms of hydrogels containing glucose oxidase (GOx) cross-linked to branched polyethyleneimine modified with  $\text{Os}(\text{bpy})_2\text{Cl}(\text{pyCOH})$  (OsBPEI) using either glutaraldehyde (GA) or ethylene glycol diglycidyl ether (EGDGE). (A) OsBPEI/GOx/GA and (B) OsBPEI/GOx/EGDGE hydrogels deposited on carbon SPEs in 0.1 M pH 7.4 phosphate buffer (PB) in the absence of glucose. Scan rate: 2 mV/s.

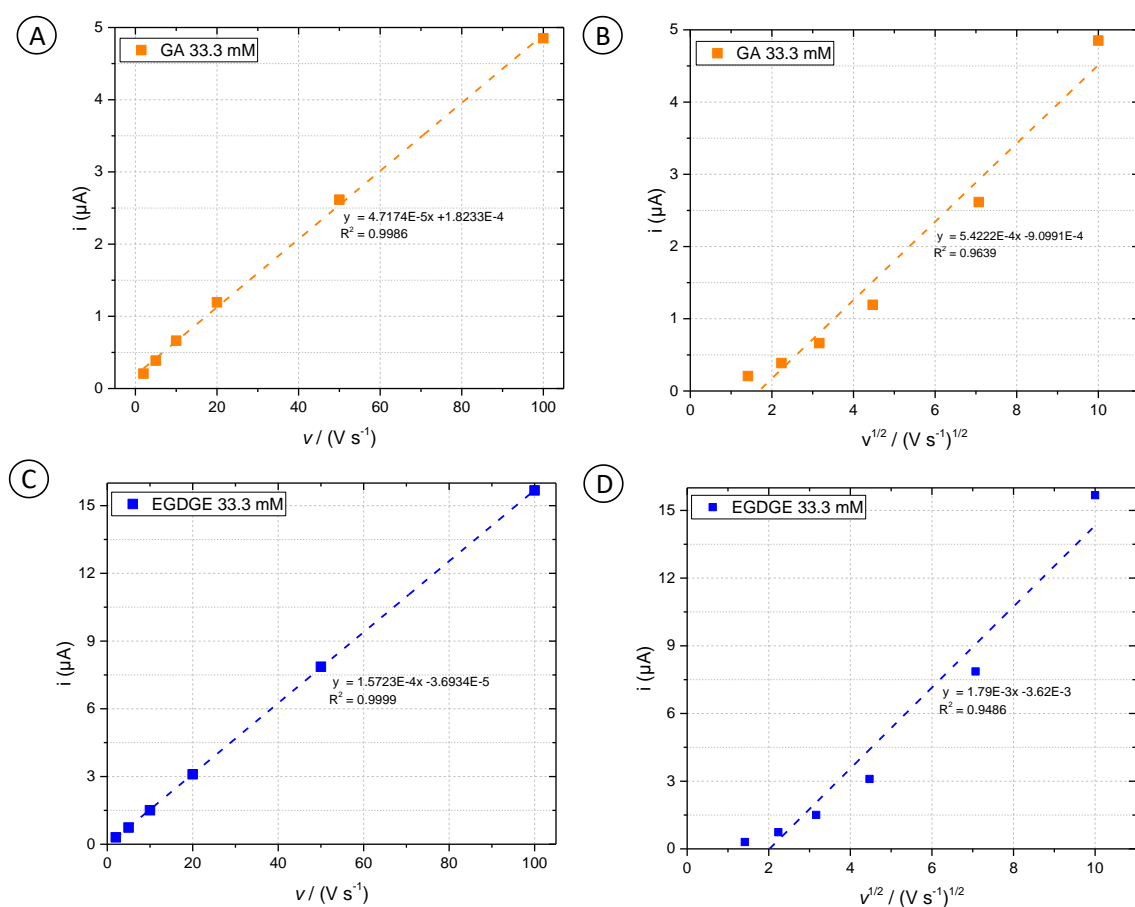

**Figure S3.** Dependence of the current of SPEs modified with OsBPEI/GOx/GA 33.3 mM (A,B) or OsBPEI/GOx/EGDGE composition (33.3 mM) (C,D) with respect to the potential scan rate (A,C) or square root of the scan rate (B,D) in 0.1 M pH 7.4 PB in the absence of glucose.

**Table S1.** Comparison of apparent Michaelis–Menten constant ( $K_m^{\text{app}}$ ) and maximum current density ( $j_{\text{max}}$ ) of different hydrogels compositions. Data from three independent electrodes are presented, as well as their mean value.

|                             | $K_m^{\text{app}}$<br>(mM) | $j_{\text{max}}$<br>( $\mu\text{A}/\text{cm}^2$ ) | $K_m^{\text{app}}$<br>(mM) | $j_{\text{max}}$<br>( $\mu\text{A}/\text{cm}^2$ ) | $K_m^{\text{app}}$ (mM) | $j_{\text{max}}$ ( $\mu\text{A}/\text{cm}^2$ ) | $K_m^{\text{app}}$<br>(mM) | $j_{\text{max}}$<br>( $\mu\text{A}/\text{cm}^2$ ) | $R^2$ |
|-----------------------------|----------------------------|---------------------------------------------------|----------------------------|---------------------------------------------------|-------------------------|------------------------------------------------|----------------------------|---------------------------------------------------|-------|
|                             | SPEs in 0.1 M pH 7.4 PB    |                                                   |                            |                                                   |                         |                                                | Mean                       |                                                   |       |
| OsBPEI/GOx/GA<br>3.33 mM    | 19.9                       | 110                                               | 43.1                       | 298                                               | 30.1                    | 230                                            | 31.8±5.32                  | 208±13.8                                          | 0.987 |
| OsBPEI/GOx/GA<br>17.5 mM    | 6.16                       | 58.4                                              | 10.6                       | 45.1                                              | 14.4                    | 89.0                                           | 10.1±0.75                  | 63.5±1.27                                         | 0.995 |
| OsBPEI/GOx/GA<br>33.3 mM    | 4.68                       | 39.4                                              | 11.4                       | 75.3                                              | 10.0                    | 69.5                                           | 8.76±0.55                  | 60.9±1.04                                         | 0.996 |
| OsBPEI/GOx/EGDGE<br>3.33 mM | 14.0                       | 60.9                                              | 13.1                       | 55.5                                              | 14.8                    | 60.6                                           | 14.0±1.20                  | 58.9±1.50                                         | 0.994 |
| OsBPEI/GOx/EGDGE<br>17.5 mM | 5.53                       | 17.2                                              | 5.53                       | 16.2                                              | 7.20                    | 35.2                                           | 6.31±0.63                  | 22.7±0.58                                         | 0.990 |
| OsBPEI/GOx/EGDGE<br>33.3 mM | 14.0                       | 41.6                                              | 8.26                       | 38.7                                              | 7.22                    | 32.4                                           | 10.9±0.94                  | 25.4±0.69                                         | 0.993 |
| BPEI/GOx/GA<br>33.3 mM      | 5.61                       | 37.5                                              | 6.30                       | 80.3                                              | 5.55                    | 63.5                                           | 5.89±0.75                  | 60.4±1.85                                         | 0.982 |
| BPEI/GOx/EGDGE              | 32.9                       | 190                                               | 22.3                       | 143.9                                             | 22.2                    | 140                                            | 28.4±7.49                  | 158±15.0                                          | 0.968 |

|                                                     |      |      |      |      |      |      |           |           |       |
|-----------------------------------------------------|------|------|------|------|------|------|-----------|-----------|-------|
| 33.3 mM                                             |      |      |      |      |      |      |           |           |       |
| SPEs in Roswell Park Memorial Institute (RPMI-1640) |      |      |      |      |      |      |           |           |       |
| OsBPEI/GOx/GA<br>33.3 mM                            | 4.00 | 31.0 | 4.49 | 54.0 | 5.51 | 43.9 | 4.68±0.73 | 43.0±1.62 | 0.976 |
| OsBPEI/GOx/EGDGE<br>33.3 mM                         | 3.59 | 44.3 | 13.5 | 161  | 12.7 | 151  | 10.6±0.99 | 113±3.01  | 0.992 |
| Carbon pencil leads in RPMI-1640 on-chip            |      |      |      |      |      |      |           |           |       |
| OsBPEI/GOx/GA<br>33.3 mM                            | 15.2 | 86.2 | 23.1 | 58.2 | 18.5 | 74.8 | 18.0±1.13 | 72.6±14.3 | 0.997 |
| OsBPEI/GOx/EGDGE<br>33.3 mM                         | 20.4 | 147  | 22.8 | 141  | 26.3 | 121  | 22.8±1.87 | 136±39.3  | 0.996 |

**Table S2.** Comparison of  $K_m^{app}$  and  $j_{max}$  of different hydrogels compositions. Data from three sequential calibration curves on a single electrode are presented.

|                                          | $K_m^{app}$<br>(mM) | $j_{max}$<br>( $\mu A/cm^2$ ) | $K_m^{app}$<br>(mM) | $j_{max}$<br>( $\mu A/cm^2$ ) | $K_m^{app}$<br>(mM) | $j_{max}$<br>( $\mu A/cm^2$ ) |
|------------------------------------------|---------------------|-------------------------------|---------------------|-------------------------------|---------------------|-------------------------------|
| SPEs in 0.1 M pH 7.4 PB                  |                     |                               |                     |                               |                     |                               |
| OsBPEI/GOx/GA<br>3.33 mM                 | 19.9                | 110                           | 12.0                | 24.5                          | 7.14                | 8.35                          |
| OsBPEI/GOx/GA<br>17.5 mM                 | 6.16                | 58.3                          | 3.50                | 19.6                          | 4.38                | 5.33                          |
| OsBPEI/GOx/GA<br>33.3 mM                 | 2.34                | 22.0                          | 1.99                | 10.5                          | 2.23                | 4.29                          |
| OsBPEI/GOx/EGDGE<br>3.33 mM              | 14.0                | 60.9                          | 5.01                | 0.81                          | -                   | -                             |
| OsBPEI/GOx/EGDGE<br>17.5 mM              | 5.53                | 17.1                          | 3.30                | 0.23                          | -                   | -                             |
| OsBPEI/GOx/EGDGE<br>33.3 mM              | 14.0                | 41.6                          | 20.8                | 3.01                          | -                   | -                             |
| BPEI/GOx/GA<br>33.3 mM                   | 5.61                | 37.4                          | 3.33                | 48.6                          | 4.62                | 52.3                          |
| BPEI/GOx/EGDGE<br>33.3 mM                | 32.9                | 190                           | 16.4                | 187                           | 11.5                | 102                           |
| SPEs in RPMI-1640                        |                     |                               |                     |                               |                     |                               |
| OsBPEI/GOx/GA<br>33.3 mM                 | 4.49                | 54.0                          | 1.89                | 9.74                          | 1.31                | 6.61                          |
| OsBPEI/GOx/EGDGE<br>33.3 mM              | 3.59                | 44.3                          | 9.48                | 26.2                          | 10.4                | 22.5                          |
| Carbon pencil leads in RPMI-1640 on-chip |                     |                               |                     |                               |                     |                               |
| OsBPEI/GOx/GA<br>33.3 mM                 | 17.3                | 74.1                          | 18.5                | 41.6                          | 11.9                | 39.3                          |
| OsBPEI/GOx/EGDGE<br>33.3 mM              | 25.4                | 121                           | 30.8                | 66.5                          | 30.9                | 60.5                          |

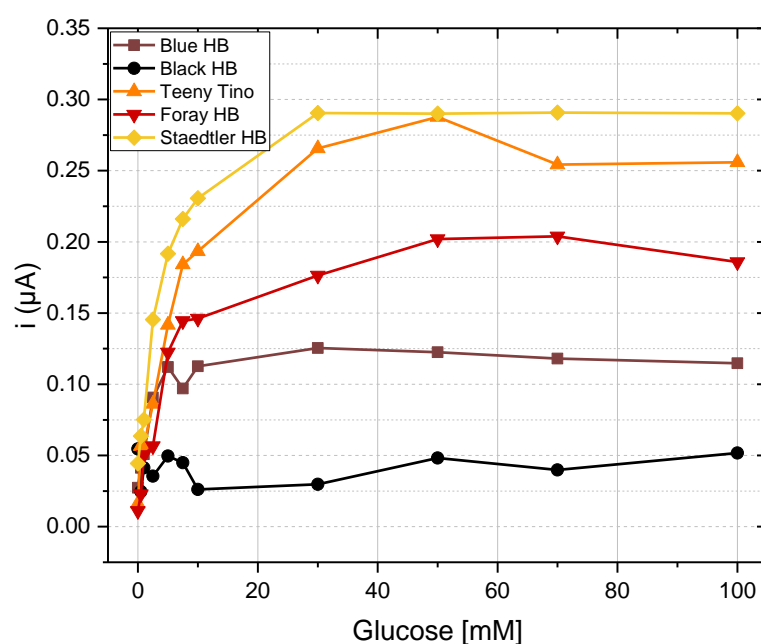

**Figure S4.** Electrochemical calibration curves performed with carbon pencil leads of different brands onto which hydrogels were deposited using GA as cross-linker. Chronoamperometric signals were measured in 0.1 M pH 7.4 PB and the current at  $t = 2$  min taken as analytical signal.

**Table S3.** Comparison of analytical performance parameters of GOx based biosensors.

| Composition               | Electrode | LOD (mM) | LOQ (mM) | Linear range (mM) | Sensitivity $\mu\text{A mM}^{-1} \text{cm}^{-2}$ | Matrix       | Ref.      |
|---------------------------|-----------|----------|----------|-------------------|--------------------------------------------------|--------------|-----------|
| CB-PB-TEMPO-CNCs-GOx      | SPE       | 0.0040   | 0.015    | 0.1–2             | 5.70                                             | DMEM*/PB 1:4 | [1]       |
| m-PPD-pHEMA-GOx           | Pt        | 0.0076   | -        | -                 | -                                                | MEBM*        | [2]       |
| CNT-GR-GOx                | GCE       | 0.0029   | 0.009    | 3–14              | 0.43                                             | DMEM         | [3]       |
| Graphene-MWCNT/GOx/nafion | PGE       | 0.0149   | -        | 0–39              | 35.2                                             | PB           | [4]       |
| GO-GOx                    | PGE       | 0.0006   | -        | 0.04–0.6          | 278.4                                            | PB           | [5]       |
| ZnS-CdS-Chitosan-GOx      | PGE       | 0.0030   | -        | 0.01–1            | 11.5                                             | BRBS*/KCl    | [6]       |
| OsBPEI-GOx-GA             | PGE       | 1.4900   | 4.970    | 0–7.5             | 3.10                                             | RPMI         | This work |
| OsBPEI-GOx-EGDGE          |           | 0.5000   | 1.670    | 0–10              | 4.69                                             |              |           |

\* Dulbecco's Modified Eagle Medium (DMEM)

\*Mammary epithelial basal medium (MEBM)

\*Britton-Robinson buffer solution (BRBS)

1. Tang, Y.; Petropoulos, K.; Kurth, F.; Gao, H.; Migliorelli, D.; Guenat, O.; Generelli, S. Screen-Printed Glucose Sensors Modified with Cellulose Nanocrystals (CNCs) for Cell Culture Monitoring. *Biosensors* **2020**, *10*, 125. <https://doi.org/10.3390/bios10090125>.
2. Dornhof, J.; Kieninger, J.; Muralidharan, H.; Maurer, J.; Urban, G.A.; Weltin, A. Microfluidic organ-on-chip system for multi-analyte monitoring of metabolites in 3D cell cultures. *Lab Chip* **2022**, *22*, 225–239. <https://doi.org/10.1039/d1lc00689d>.
3. Madhurantakam, S.; Babu, J.K.; Balaguru Rayappan, J.B.; Maheswari Krishnan, U. Fabrication of mediator-free hybrid nano-interfaced electrochemical biosensor for monitoring cancer cell proliferation. *Biosens. Bioelectron.* **2017**, *207*, 832–841. <https://doi.org/10.1016/j.bios.2016.09.039>.
4. Torrinha, Á.; Montenegro, M.C.B.S.M.; Araújo, A.N. Microfluidic Platform with an Embedded Pencil Graphite Electrode Biosensor for the Detection of Glucose and Cadmium. *J. Electrochem. Soc.* **2019**, *166*, B155–B160. <https://doi.org/10.1149/2.1221902jes>.

5. Sehat, A.A.; Khodadadi, A.A.; Shemirani, F.; Mortazavi, Y. Fast immobilization of glucose oxidase on graphene oxide for highly sensitive glucose biosensor fabrication. *Int. J. Electrochem. Sci.* **2015**, *10*, 272–286.
6. Saglam, Ö.; Kizilkaya, B.; Uysal, H.; Dilgin, Y. Biosensing of glucose in flow injection analysis system based on glucose oxidase-quantum dot modified pencil graphite electrode. *Talanta* **2016**, *147*, 315–321. <https://doi.org/10.1016/j.talanta.2015.09.050>.
